# Supplementary material for: Genome-Wide Identification of m6A Writers, Erasers and Readers in Poplar 84K
Source: MDPI journal article supplement (doi:10.3390/genes13061018), 2022-06-05
Supplement: s1 [file s1]

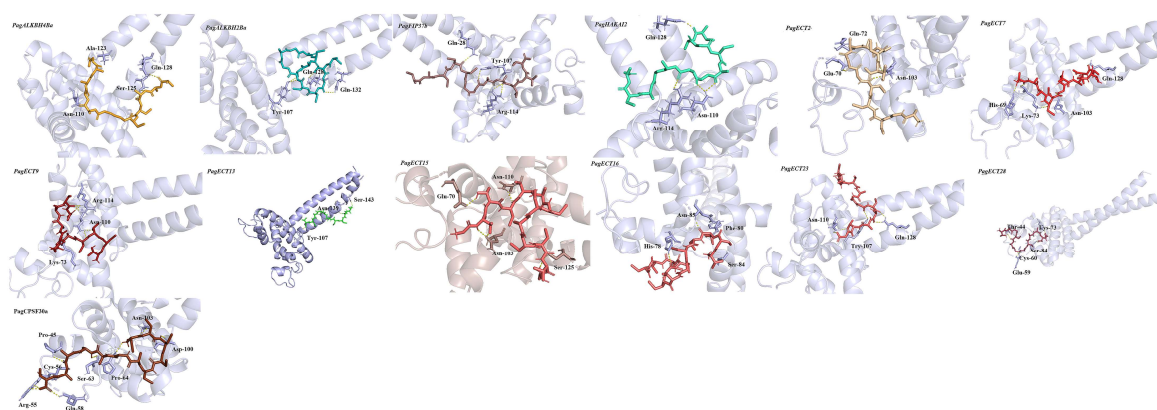

**Figure S1.** The results of molecular docking between *cis*-elements of m<sup>6</sup>A pathway genes and *LBD15*.
