# Supplementary material for: Genome-Wide Identification of m6A Writers, Erasers and Readers in Poplar 84K
Source: Genes (Basel). 2022 Jun 5;13(6):1018. doi: 10.3390/genes13061018 (PMC9223284; doi:10.3390/genes13061018)
Supplement: Supplementary file 1 [file genes-13-01018-s001.zip › Supplementary Data.xlsx]

## Sheet: Table S1
Table S1 dN/dS analysis of writers, readers and erasers.
	PagFIP37b	PagVIRILIZER1	PagVIRILIZER2	PagHAKAI1	PagHAKAI2	PagMTA1	PagMTA2	PagMTA3	PagMTA4	PagMTB1	PagMTB3	PagMTB2	PagMTB4
PagFIP37b
PagVIRILIZER1	3.55388
PagVIRILIZER2	3.55388	1e-06
PagHAKAI1	10.0194	2.93077	2.93077
PagHAKAI2	9.95251	2.92165	2.92165	0.00898045
PagMTA1	6.43368	5.16754	5.16754	7.03651	7.01264
PagMTA2	6.43368	5.16754	5.16754	7.03651	7.01264	1e-06
PagMTA3	4.78767	6.88402	6.88402	9.68261	9.6758	6.54824	6.54824
PagMTA4	4.93692	7.24013	7.24013	10.8053	10.8276	6.20006	6.20006	0.00888178
PagMTB1	6.2689	5.6508	5.6508	4.93555	4.91277	1.327	1.327	5.89306	5.75269
PagMTB3	6.2689	5.6508	5.6508	4.93555	4.91277	1.327	1.327	5.89306	5.75269	1e-06
PagMTB2	6.02945	5.62355	5.62355	5.23696	5.21404	1.28305	1.28305	5.56508	5.44421	0.0802967	0.0802967
PagMTB4	6.02945	5.62355	5.62355	5.23696	5.21404	1.28305	1.28305	5.56508	5.44421	0.0802967	0.0802967	1e-06
	PagALKBH1Ba	PagALKBH1Bb	PagALKBH7Ba	PagALKBH7Bb	PagALKBH3Ba	PagALKBH3Bb	PagALKBH4Ba	PagALKBH4Bb	PagALKBH2Bb	PagALKBH2Ba	PagALKBH6Ba	PagALKBH5Ba	PagALKBH5Bb	PagALKBH6Bb
PagALKBH1Ba
PagALKBH1Bb	1e-06
PagALKBH7Ba	1.19582	1.19582
PagALKBH7Bb	1.18923	1.18923	0.0361895
PagALKBH3Ba	6.71033	6.71033	4.88997	4.53149
PagALKBH3Bb	6.71033	6.71033	4.88997	4.53149	1e-06
PagALKBH4Ba	2.2251	2.2251	1.97093	2.25099	7.79015	7.79015
PagALKBH4Bb	2.2251	2.2251	1.97093	2.25099	7.79015	7.79015	1e-06
PagALKBH2Bb	2.47192	2.47192	1.75104	1.99356	8.73521	8.73521	0.110319	0.110319
PagALKBH2Ba	2.38673	2.38673	1.76596	2.0117	8.69127	8.69127	0.0725238	0.0725238	0.0354529
PagALKBH6Ba	5.89642	5.89642	5.51163	5.8529	5.73706	5.73706	1.77204	1.77204	1.48209	1.50618
PagALKBH5Ba	1.89335	1.89335	2.30825	2.44004	4.37788	4.37788	3.94323	3.94323	3.82427	3.91479	5.32631
PagALKBH5Bb	1.89335	1.89335	2.30825	2.44004	4.37788	4.37788	3.94323	3.94323	3.82427	3.91479	5.32631	1e-06
PagALKBH6Bb	5.89642	5.89642	5.51163	5.8529	5.73706	5.73706	1.77204	1.77204	1.48209	1.50618	1e-06	5.32631	5.32631
	PagECT1	PagECT2	PagECT3	PagECT4	PagECT5	PagECT6	PagECT7	PagECT8	PagECT9	PagECT10	PagECT11	PagECT12	PagECT13	PagECT14	PagECT15	PagECT16	PagECT17	PagECT18	PagECT19	PagECT20	PagECT21	PagECT22	PagECT23	PagECT24	PagECT25	PagECT26	PagECT27	PagECT28	PagCPSF30c	PagCPSF30e	PagCPSF30a	PagCPSF30b	PagCPSF30d
PagECT1
PagECT2	0.455
PagECT3	0	0.455
PagECT4	0	0.455	0
PagECT5	0	0.455	0	0
PagECT6	0.277	0.648	0.277	0.277	0.277
PagECT7	0.455	0	0.455	0.455	0.455	0.648
PagECT8	0.455	0	0.455	0.455	0.455	0.648	0
PagECT9	0.455	0	0.455	0.455	0.455	0.648	0	0
PagECT10	0.595	0.391	0.595	0.595	0.595	0.44	0.391	0.391	0.391
PagECT11	0.595	0.391	0.595	0.595	0.595	0.44	0.391	0.391	0.391	0
PagECT12	0.338	0.325	0.338	0.338	0.338	0.432	0.325	0.325	0.325	0.33	0.33
PagECT13	0.266	0.385	0.266	0.266	0.266	0.35	0.385	0.385	0.385	0.327	0.327	0.099
PagECT14	0.574	0.452	0.574	0.574	0.574	0.423	0.452	0.452	0.452	0.048	0.048	0.388	0.269
PagECT15	0.338	0.325	0.338	0.338	0.338	0.432	0.325	0.325	0.325	0.33	0.33	0	0.099	0.388
PagECT16	0.266	0.385	0.266	0.266	0.266	0.35	0.385	0.385	0.385	0.327	0.327	0.099	0	0.269	0.099
PagECT17	0.65	0.517	0.65	0.65	0.65	0.491	0.517	0.517	0.517	0.097	0.097	0.451	0.327	0.048	0.451	0.327
PagECT18	0.356	0.545	0.356	0.356	0.356	0.049	0.545	0.545	0.545	0.356	0.356	0.35	0.346	0.417	0.35	0.346	0.483
PagECT19	0.423	0.511	0.423	0.423	0.423	0.1	0.511	0.511	0.511	0.334	0.334	0.288	0.285	0.392	0.288	0.285	0.455	0.047
PagECT20	0.574	0.422	0.574	0.574	0.574	0.31	0.422	0.422	0.422	0.316	0.316	0.327	0.398	0.381	0.327	0.398	0.449	0.234	0.219
PagECT21	0.356	0.545	0.356	0.356	0.356	0.049	0.545	0.545	0.545	0.356	0.356	0.35	0.346	0.417	0.35	0.346	0.483	0	0.047	0.234
PagECT22	0.574	0.422	0.574	0.574	0.574	0.31	0.422	0.422	0.422	0.316	0.316	0.327	0.398	0.381	0.327	0.398	0.449	0.234	0.219	0	0.234
PagECT23	0.204	0.453	0.204	0.204	0.204	0.347	0.453	0.453	0.453	0.48	0.48	0.475	0.445	0.521	0.475	0.445	0.593	0.347	0.353	0.481	0.347	0.481
PagECT24	0.423	0.511	0.423	0.423	0.423	0.1	0.511	0.511	0.511	0.334	0.334	0.288	0.285	0.392	0.288	0.285	0.455	0.047	0	0.219	0.047	0.219	0.353467
PagECT25	0.574	0.422	0.574	0.574	0.574	0.31	0.422	0.422	0.422	0.316	0.316	0.327	0.398	0.381	0.327	0.398	0.449	0.234	0.219	0	0.234	0	0.481385	0.219
PagECT26	0.277	0.648	0.277	0.277	0.277	0	0.648	0.648	0.648	0.44	0.44	0.432	0.35	0.423	0.432	0.35	0.491	0.049	0.1	0.31	0.049	0.31	0.34654	0.1	0.31
PagECT27	0.574	0.422	0.574	0.574	0.574	0.31	0.422	0.422	0.422	0.316	0.316	0.327	0.398	0.381	0.327	0.398	0.449	0.234	0.219	0	0.234	0	0.481385	0.219	0	0.31
PagECT28	0.204	0.453	0.204	0.204	0.204	0.347	0.453	0.453	0.453	0.48	0.48	0.475	0.445	0.521	0.475	0.445	0.593	0.347	0.353	0.481	0.347	0.481	1e-06	0.353	0.481	0.347	0.481
PagCPSF30c	40.919	41.366	40.919	40.919	40.919	40.281	41.366	41.366	41.366	41.299	41.299	41	41.187	41.327	41	41.187	41.211	40.646	40.455	40.421	40.646	40.421	40.6401	40.455	40.421	40.281	40.421	40.6401
PagCPSF30e	40.6	41.108	40.6	40.6	40.6	39.881	41.108	41.108	41.108	41.017	41.017	40.704	40.912	41.051	40.704	40.912	40.923	40.293	40.096	40.06	40.293	40.06	40.3039	40.096	40.06	39.881	40.06	40.3039	0.042
PagCPSF30a	4.835	4.225	4.835	4.835	4.835	4.655	4.225	4.225	4.225	5.936	5.936	4.12	4.288	5.741	4.12	4.288	5.052	4.181	4.394	4.192	4.181	4.192	4.38116	4.394	4.192	4.655	4.192	4.38116	8.006	5.2
PagCPSF30b	4.62	3.843	4.62	4.62	4.62	4.115	3.843	3.843	3.843	40.669	40.669	3.702	3.907	49.163	3.702	3.907	8.355	3.647	3.923	3.732	3.647	3.732	3.93356	3.923	3.732	4.115	3.732	3.93356	6.942	4.594	0.211
PagCPSF30d	4.62	3.843	4.62	4.62	4.62	4.115	3.843	3.843	3.843	40.669	40.669	3.702	3.907	49.163	3.702	3.907	8.355	3.647	3.923	3.732	3.647	3.732	3.93356	3.923	3.732	4.115	3.732	3.93356	6.942	4.594	0.211	0

## Sheet: Table S2
Table S2: The cis-regulatory elements in the promoter of m6A pathway genes
	Fuction	Anaerobic response	Ethylene response	MeJA response		Light response		SA response	Auxin responsive		Gibberellin response			Low-temperature stress	Drought stress	Abscisic acid response	MYB
	Element	ARE	ERE	CGTCA-motif	TGACG-motif	GT1-motif	Sp1	TCA	AuxRR-core	TGA-element	GARE-motif	TATC-box	P-box	LTR	MBS	ABRE
Easers	PagALKBH1Ba	4	2	1	1	-	-	-	-	-	-	-	-	2	-	-	1
	PagALKBH1Bb	2	2	2	2	-	-	-	-	-	-	1	-	1	1	2	1
	PagALKBH2Ba	-	2	-	-	1	-	3	-	-	-	-	-	-	-	1	-
	PagALKBH2Bb	-	4	-	-	1	-	1	-	-	-	-	-	-	-	2	-
	PagALKBH3Ba	2	4	2	2	4	-	1	-	1	-	1	-	-	3	1	4
	PagALKBH3Bb	2	-	1	1	-	-	1	-	-	-	-	-	-	1	1	1
	PagALKBH4Ba	3	2	4	4	-	-	1	-	-	1	-	1	2	1	4	1
	PagALKBH4Bb	6	3	3	3	-	-	1	-	1	1	-	-	1	1	1	1
	PagALKBH5Ba	3	-	3	3	1	-	1	-		3	-	-	1	1	1	1
	PagALKBH5Bb	2	-	2	2	2	-	1	-	1	2	-	-	1	2	1	2
	PagALKBH6Ba	1	5	2	2	3	-	1	-	1	-	-	1	-	1	2	1
	PagALKBH6Bb	1	2	1	1	-	-	1	-	3	-	-	-	-	1	5	2
	PagALKBH7Ba	4	2	1	1	-	1	1	1	-	1	-	-	-	1	1	2
	PagALKBH7Bb	2	3	-	-	-	1	1	1	-	1	-	-	-	1	1	1
Readers	PagCPSF30a	4	4	-	-	1	-	1	-	-	-	1	-	-	1	-	1
	PagCPSF30b	3	8	1	1	2	1	1	-	-	-	1	1	2	1	1	1
	PagCPSF30c	-	2	1	1	2	-	-	1	-	-	1	-	-	2	4	2
	PagCPSF30d	2	1	-	-	1	2	1	-	1	-	-	-	-	1	-	1
	PagCPSF30e	-	3	-	-	2	1	1	1	-	-	1	-	-	2	5	3
	PagECT1	3	2	1	1	-	-	7	-	2	-	-	-	-	3	3	3
	PagECT2	4	-	-	-	4	-	1	-	-	-	-	1	1	-	1	1
	PagECT3	5	2	-	-	-	-	1	-	1	-	-	-	-	-	1	2
	PagECT4	4	2	-	-	-	-	-	-	1	1	-	-	-	-	1	2
	PagECT5	3	2	1	1	-	-	8	-	2	-	-	-	-	4	3	4
	PagECT6	4	2	1	1	-	-	-	-	-	-	-	1	-	1	1	1
	PagECT7	2	6	1	1	2	-	1	-	-	-	-	-	4	-	1	-
	PagECT8	4	1	-	-	3	-	1	1	-	1	-	-	1	-	-	1
	PagECT9	4	6	-	-	1	-	-	1	-	1	-	-	4	-	3	1
	PagECT10	2	2	3	3	1	-	-	-	-		-	-	2	-	1	1
	PagECT11	4	1	-	-	-	-	2	-	-	1	1	1	-	-	2	-
	PagECT12	2	1	1	1	1	1	4	-	-	-	-	-	-	-	5	1
	PagECT13	1	3	2	2	1	1	-	1	-	-	-	-	1	-	2	1
	PagECT14	2	7	2	2	3	2	-	-	-	-	-	-	-	1	-	3
	PagECT15	2	-	-	-	1	1	2	-	-	-	-	1	-	1	5	1
	PagECT16	-	3	-	3	2	1	-	-	-	1	-	-	1	-	3	1
	PagECT17	2	8	1	1	5	1	1	-	1	-	-	-	-	1	1	3
	PagECT18	4	-	-	-	2	-	2	-	-	-	-	-	-	-	-	1
	PagECT19	1	-	3	3	-	-	3	-	1	-	-	1	-	2	1	3
	PagECT20	2	3	-	-	4	-	1	-	-	-	-	-	2	1	1	2
	PagECT21	2	-	3	3	1	-	-	1	-	-	-	-	-	1	-	2
	PagECT22	3	-	2	2	-	-	1	-	-	-	-	-	-	1	1	4
	PagECT23	2	6	1	1	-	-	3	-	-	-	-	1	-	1	2	1
	PagECT24	2	-	-	-	-	-	3	-	-	1	-	1	1	2	1	3
	PagECT25	3	2	-	-	-	-	-	-	-	1	-	-	1	-	-	-
	PagECT26	3	4	3	3	-	1	1	-	-	1	-	-	-	1	3	1
	PagECT27	3	-	2	2	1	-	-	-	-	-	-	-	-	1	2	3
	PagECT28	2	3	1	1		-	1	-	-	-	-	1	-	1	2	1
Writers	PagFIP37a	3	4	1	1	2	-	2	-	1	-	-	1	-	1	1	1
	PagFIP37b	1	4	1	1	2	-	1	-	1	-	-	1	-	-	3	-
	PagHAKAI1	3	-	1	1	-	-	-	-	-	2	-	-	-	-	-	-
	PagHAKAI2	4	1	-	-	-	-	1	-	2	-	-	-	-	1	2	1
	PagMTA1	4	5	-	-	3	-	1	-	-	-	1	-	-	1	-	1
	PagMTA2	3	-	2	2	-	-	2	-	-	-	-	1	-	2	-	3
	PagMTC1	2	5	2	2	-	-	1	-	-	-	-	1	-	-	3	2
	PagMTC2	3	7	2	2	-	-	1	-	-	-	-	1	-	-	2	1
	PagMTB1	1	1	1	1	3	-	2		1	1	1	2	-	-	2	2
	PagMTB2	4	1	3	3	3	-	1	1	2	3	-	1	1	-	-	2
	PagMTB3	5	1	2	2	2	2	3	-	-	-	-	3	1	1	1	2
	PagMTB4	4	1	2	2	2	1	-	-	2	-	-	1	-	1		2
	PagVIRILIZER1	3	3	2	2	1	-	1	-	-	-	-	1	-	-	3	2
	PagVIRILIZER2	2	2	2	2	-	-	1	-	-	-	-	1	-	-	1	3

## Sheet: Table S3
Table S3 Accession numbers, name codes and amino acid sequences of m6A related genes from Arabidopsis thaliana and Oryza sativa.
Species name	Accession numbers	Name codes	Name codes
Arabidopsis thaliana	AT4G10760	AtMTA	METESDDATITVVKDMRVRLENRIRTQHDAHLDLLSSLQSIVPDIVPSLDLSLKLISSFTNRPFVATPPLPEPKVEKKHHPIVKLGTQLQQLHGHDSKSMLVDSNQRDAEADGSSGSPMALVRAMVAECLLQRVPFSPTDSSTVLRKLENDQNARPAEKAALRDLGGECGPILAVETALKSMAEENGSVELEEFEVSGKPRIMVLAIDRTRLLKELPESFQGNNESNRVVETPNSIENATVSGGGFGVSGSGNFPRPEMWGGDPNMGFRPMMNAPRGMQMMGMHHPMGIMGRPPPFPLPLPLPVPSNQKLRSEEEDLKDVEALLSKKSFKEKQQSRTGEELLDLIHRPTAKEAATAAKFKSKGGSQVKYYCRYLTKEDCRLQSGSHIACNKRHFRRLIA…
	AT4G09980	AtMTB	MKKKQEESSLEKLSTWYQDGEQDGGDRSEKRRMSLKASDFESSSRSGGSKSKEDNKSVVDVEHQDRDSKRERDGRERTHGSSSDSSKRKRWDEAGGLVNDGDHKSSKLSDSRHDSGGERVSVSNEHGESRRDLKSDRSLKTSSRDEKSKSRGVKDDDRGSPLKKTSGKDGSEVVREVGRSNRSKTPDADYEKEKYSRKDERSRGRDDGWSDRDRDQEGLKDNWKRRHSSSGDKDQKDGDLLYDRGREREFPRQGRERSEGERSHGRLGGRKDGNRGEAVKALSSGGVSNENYDVIEIQTKPHDYVRGESGPNFARMTESGQQPPKKPSNNEEEWAHNQEGRQRSETFGFGSYGEDSRDEAGEASSDYSGAKARNQRGSTPGRTNFVQTPNRGYQTPQGT…
	AT1G19340	AtMTC	MAKTDKLAQFLDSGIYESDEFNWFFLDTVRITNRSYTRFKVSPSAYYSRFFNSKQLNQHSSESNPKKRKRKQKNSSFHLPSVGEQASNLRHQEARLFLSKAHESFLKEIELLSLTKGLSDDNDDDDSSLLNKCCDDEVSFIELGGVWQAPFYEITLSFNLHCDNEGESCNEQRVFQVFNNLVVNEIGEEVEAEFSNRRYIMPRNSCFYMSDLHHIRNLVPAKSEEGYNLIVIDPPWENASAHQKSKYPTLPNQYFLSLPIKQLAHAEGALVALWVTNREKLLSFVEKELFPAWGIKYVATMYWLKVKPDGTLICDLDLVHHKPYEYLLLGYHFTELAGSEKRSDFKLLDKNQIIMSIPGDFSRKPPIGDILLKHTPGSQPARCLELFAREMAAGWTSWG…
	AT3G54170	AtFIP37	MEFSSQDDDFGGDDSAANATRASGNRRSFGDLEDDEDDIFGSTTVAPGVRTGMILSLRGSLKNCKDDLASCQNELESAKTEIQKWKSAFQNESFVPAGKSPEPRFLIDYIQNLKSSEKSLKEQLEIAKRKEASCIVQYAKREQEMAELKSAVRDLKSQLKPASMQARRLLLDPAIHEEFSRLKNLVEEKDKKIKELQDNIAAVTFTPQSKNGKMLMAKCRTLQEENEEIGHQAAEGKIHELAIKLAMQKSQNAELRSQFEGLYKHMEELTNDVERSNETVIILQEKLEEKEKEIERVKKGLEIVSELVGDKKDEVDEIDEDAKEEIAGGE
	AT3G05680	AtVIR	MVRSEPCVLFAQTFVHPQLDEYVDEVIFAEPVIITACEFLEQNASSSSQAVSLVGATSPPSFALEVFVRCEGESKFKRLCNPFLYTPSAPYPLEVEAVVTNHLVVRGSYRSLSLIVYGNIVKDLGQYNIILEGRSVTDIVSSTEGNLEDLPLVLHSVNRTIEECLSSLDIVSLPLAAVDLPVEVKRLLQLLLKIFDKLATNDVVNKFVDTVVSGVSSYVTDNVDFFLKNKNCSAVTSSLDSGLFHDIVDRVKEDILDLNEIQESDVALGLFSFLESETYLATSQQLVVMLSPYIQFERDSLCTVLPKLSKGKATLLGLSLAFLLCSGREGCLQFVNSGGMDQLVYLFGHDGQNSTTITLLLLGVVEQATRHSVGCEGFLGWWPREDGSIPSGKSEGYCL…
	AT5G01160	AtHAKAI	MLQIRLRRDSPTETGNGARPSPTETVTVACPDHLVLADLPVAKGIGSVTPTTVIKPVGRRSRRQLGERVHFCVRCDFPIAIYGRLIPCDHAFCLECARSDSICYLCDERIQKIQTIKMMEGIFICAAPHCLRSFLKKLDFEAHVHDLHGSLLQADAEKEDGNQSDVQSTMQQSSASESTLRAPLRSQLQQSRELNRSASFAKSQSGFSQVQNYPPDSDNSRPPGFETASPKPGIRFPDYPQPMNLMQPPSLPVPMNQNPGLPQQFGFPSYPTTESGSSQQFFNGAQYEMTRTESGGSEQSSLLGYPPPSPMTNLNFQGSYPPPSWNPGMAPPHTTQQVNRGRDGQSFGWPQENRDGFGQE
	AT2G17970	AtALKBH9B	MENDPFLRQYQPSELKIASEFLTNWLPFLSKDLCKDCNHLLSNRIRSLDPAHCSNNTDKVDGECKTGSCSVVENMGSERASNNVDDNYDEKSENGEDCDNHSLGSWKGSEIVFGSFPEDFSSVLQSRPAVVETASPRMRWADMAQEDEFDEEEEEEEEERDSSRKGFDASSMKTPEKPKLSRDQRENLRLINVKRKKDFICLERVKGKIVNVLDGLELHTGVFSAVEQKRIVDQVYQLQEKGRRGELKKRTFTAPHKWMRGKGRETIQFGCCYNYAPDRAGNPPGILQREEVDPLPHLFKVIIRKLIKWHVLPPTCVPDSCIVNIYDEGDCIPPHIDNHDFLRPFCTISFLSECDILFGSNLKVEGPGDFSGSYSIPLPVGSVLVLNGNGADVAKHCVP…
	AT4G02940	AtALKBH10B	MTIAAAPARQTDRSATGFNPAYVTTAKAVSVPVQVPPATVVSEGLGKDALISWFRGEFAAANAIIDAMCSHLRIAEEAVSGSEYEAVFAAIHRRRLNWIPVLQMQKYHSIAEVAIELQKVAAKKAEDLKQKKTEEEAEEDLKEVVATEEEEVKKECFNGEKVTENDVNGDVEDVEDDSPTSDITDSGSHQDVHQTVVADTAHQIICHSHEDCDARSCEIKPIKGFQAKEQVKGHTVNVVKGLKLYEELLKEDEISKLLDFVAELREAGINGKLAGESFILFNKQIKGNKRELIQLGVPIFGHVKADENSNDTNNSVNIEPIPPLLESVIDHFVTWRLIPEYKRPNGCVINFFEEGEYSQPFLKPPHLEQPISTLVLSESTMAYGRILSSDNEGNFRGPL…
	AT4G02485	AtALKBH1B	MDEEAENLRAAFGDSSDDEDIADRPGKETIGIGDSAVWERVEEINGLWLYRNFLSIAHQSHLLSAILNEGWFVEESINQAMRFGDLPSWATELSDLIRETLESVDLPVLSADLLWREPLFDQLIVNLYQPGEGICAHVDLLRFEDGIAIVSLESPCVMRFSPAEKNEYEAVDVLLNPGSLILMSGEARYRWKHEINRKQNGFQLWEGEEIDQKRRISITLRKLCQA
	AT2G22260	AtALKBH2B	MWFSSQNGFLVPSLFNVSYRKNCSGHKLKEVTDSDTFSDNGKDDSDTKKRFHYHQDQRRMSLTSIVAVESPSSSNAPSRKTIDLGHGSDLIYIQRFLPFQQSWTFFDYLDKHIPWTRPTIRVFGRSCLQPRDTCYVASSGLTALVYSGYRPTSYSWDDFPPLKEILDAIYKVLPGSRFNSLLLNRYKGASDYVAWHADDEKIYGPTPEIASVSFGCERDFVLKKKKDEESSQGKTGDSGPAKKRLKRSSREDQQSLTLKHGSLLVMRGYTQRDWIHSVPKRAKAEGTRINLTFRLVL
	AT3G14160	AtALKBH3B	MNHSEARGSGGHKGYRGRSQASEQWVPVAADDKSLEDSSGNRVRGSQGKGRSRTSWSPRNSYGRGNDEHSPVQAYVNKSNVGFVEKGVQQDRKSLEDGIGSTKQPDDGAAAGDNKAVLQSKSTNVSGGSFVSSECEDKDGAKMYCDLVNRVNDVTLSCQESVSSTVVQKVELSSVEDQKSAPKADGAGNSSNESSTRHFDIFLEKKGIVLKPNLLVLSREKKKAAKGYSGTVIRPGMVLLKNYLSINDQVMIVNKCRRLGLGEGGFYQPGYRDEAKLHLKMMCLGKNWDPETSRYGETRPFDGSTAPRIPAEFNQFVEKAVKESQSLAASNSKQTKGGDEIPFMLPDICIVNFYSSTGRLGLHQDKDESENSIRKGLPVVSFSIGDSAEFLYGDQRDED…
	AT1G31600	AtALKBH4B	MGWPWADHWTMVLNGLGQIFRPLSIKDQPLEPMKKMFQVDMTIGLWTAQLTLLTQVNVIVFFIEHIGEDTSPLYDRRKLQSFIPRMVQPRFVRPTQSSPSSISGEPNSSNLYVANCGPAVGLTHNAIAAVFAEFGEVNGVYAADDSGVRVIVSFADPFSAKAALEALSGRPCPDLKGRSLHIRYSVLQLPSETQVNDCVPVSLIDSELNIPGLFLLPDFVTVAEEQQLLAAVDARHWIGLAKRRVQHYGYEFCYGTRNVDTKKRLGELPSFVSPILERIYLFPNFDNGSASLNLDQLTVNEYPSGVGLSPHIDTHSAFEDCIFSLSLAGPCIMEFRRYSVSTWKASTTDAEKSGDSSCIKKALYLPPRSMLLLSGEARYAWNHYIPHHKIDKVKDKVIR…
	AT1G48980	AtALKBH5B	MDNYSFIRQSELEIASKVNLLSKRIRSQEQEVAVDFSHMTLEDELSEEEDHKDSSREAFGSSLENHKLSRKQRTHIRAINVKRKRDFVCLEKVNGELVNILEGLELHTEVFNAAEQRRIVDKVCELQEKVQKGELKRAFTAQGKGRSTIQFGCCFNYRTSKTGNLAGILKHETVDPLPHLFKVIIRRLVKWHVLPPTCVPDCCVVNIYDEGDCIPPHIDHHDFLRPFCTVSFLSECNILFGSNLKVEETGEYSGGSYSLPLPVGSVLVLNGNGADVAKHCVPEVPTKRKMDESKWPVWYTPEPYLQGIQPLTYELKSCGSSDHVF
	AT1G11780	AtALKBH6B	MYESANVSDDADRTAFRRAEKKYKLYYEQDSKFSRKKKLPKPIDLSELLDFNLISQNFNNDGVLPDGIRVSKVDSSPVFCIDNRPGFYFIPDALSLKEQCKWIKESLTSFPQPPNRTNHNAIYGPIDDLFDSAKENKVLVQDDLTNNKWKFYEEVDIEKATRSSCKSVSASVLLRKLRWSTLGLQFDWSKRNYDVSLPHNNIPDALCQLAKTHAAIAMPDGEEFRPEGAIVNYFGIGDTLGGHLDDMEADWSKPIVSMSLGCKAIFLLGGKSKDDPPHAMYLRSGDVVLMAGEARECFHGIPRIFTGEENADIGALESELSHESGHFFAEYIKTSRININIRQVF
	AT3G14140	AtALKBH7B	MATTNYSMIFIGNLQVAVDRSSLYESSDYSSFVARECLNKDSAMKPYDIFIFEKDEHFSVEDHYTAGNSSNESNTRPSDIFLKKKLVGLNPSILQLNREKRKATLKFSGDNKDILQSTLSSSKNINLSGGLFVSREYENKYVKFGARMRCDLVNRMKDVTLAWHESVSSTSDKNVELSSVENHKIAPKADGPGNSSNESSSSPFDIFLKKKVMRLKPSFLELNREKKKAAKGFSGIVIRPGMVLLKNYLSINNQVMIVNKCRQLGLGEGGFYQPGFQDGGLLHLKMMCLGKNWDCQTRRYGEIRPIDGSVPPRIPVEFSQLVEKAIKESKSLVATNSNETKGGDEIPLLLPDICVVNFYTSTGKLGLHQVSVYDKTSFDFLKYKGGYLNTDKGESKKSL…
	AT1G14710	AtALKBH8B	MAMPPPGNVTTPSEKLQFPPPANWIPDERDGFISWLRAEFAAANAIIDSLCQHLQAVGDHNEYESVIGSIHHRRLAWSQVLTMQQFFPVADVSYNLQQIAWKRQQQMPPQRHYNSDQVGKFGARRSGPGFNKHHGGGGGYRGADSMARNGHNFNGVNSDRVEHREEAKLASDVKALSVAEEKRDGSEKPRSDSKVEKKLEESETQEEIVKNHKCNSGSKDNSLISEQKQEENDKECPASMAKTFVVQEMYDAKMVNVVEGLKLYDKMLDANEVSQLVSLVTNLRLAGRRGQLQSEAYVGYKRPNRGHGREMIQLGLPIADTPPDDDSIKDRRIEPIPSALSDIIERLVSKQIIPVKPDACIIDFFSEGDHSQPHMFVPWFGRPISVLSLSECDYTFGRV…
	AT4G20350	AtALKBH11B	MKRVLFHKSVMPPWLTKITAEIHESSGLFPSAINHVLINEYHPDQGIMPHQDGPAYFPVVAILSLGSPVVMDFTPHLRLRSGDGYISKDQSPCAESCAPERDSFSVLLMPQSLLIFKDDAYSDFLHGISDSPTQCYNQVVNEAEALAYSNEEDSRKDGDKIFHRDQTRVSLTCRLVPKVRKNLFRF
	AT2G48080	AtALKBH12B	MAETPASPPLHPPVVLLSDSAAKDAMLTWFRGEFAAANAIIDALCAHLMQASGGSAQYESVMAALHRRRLNWIPVLQMQKYHSISQVTLQLQQHLAKGFHHHLDDDHDDDSPSSDITDGGSREEETLSICCKHEDECESRGASLLKQSKRFSAKEHVRGHTANVVKGLKLYQDVFTRPQLSKLLDSINQLREAGRNHQLSGETFVLFNKNTKGTKRELLQLGVPIFGNTTDEHSVEPIPTLVQSVIDHLLQWRLIPEYKRPNGCVINFFDEDEHSQPFQKPPHVDQPISTLVLSESTMVFGHRLGVDNDGNFRGSLTLPLKEGSLLVMRGNSADMARHVMCPSPNKRVAITFFKLKPDSGKVQPPPTLWRPGTPSPLVMLAPAPKRLDAGTGVFLPWTP…
	AT4G36090	AtALKBH13B	MEPNYEEDVFLAKYQSSELKIASEFLTNWLPFLSRDLCNDCAHVLSDRIRSLDPEHCSNGEVKAGSGSMVDNMESEEVDNMESEEVDNKMDNIYDGKLCVSHSLDSLKAGAFVFGSLSDSVSHAMPSSQSTVSEAASAQMSWADMGEEDGLEEEDQKENELGSHGVDVSPSVGDSMKTPEKRKLSREERERYRFMNVKKMKVFSCYEKVRGRSVNILEGLELHTGVFSAVEQKKIVDFVYELQEKGRRGELRERTFTAPHKWMRGKGRVTIQFGCCYNYAPDKAGNPPGILQRGDVDPMPSIFKVIIKRLVGWHVLPPTCVPDSCIVNIYEEDDCIPPHIDNHDFLRPFCTVSFLSECNILFGSNLKVLGPGEFSGSYSIPLPVG
	AT3G03950	AtECT1	MAGAASSDRLVTSFPLLDTADLFQDLSLGSDANEVPMNFTKGSFQHPYGHAPYGASSHGSERRPNMNAGNLLNGGDSIGSYPWGYIPANYPSGGYPDPRFGYDRNSNHSSFSHLMNPHSSQEVPSFDQLGYNDHLYSNHGLYGLYGNVIDSGHAYGTFGYDSWKLGRGWYPVDGYRKTRSFNHGRGYSDEKADRLNELCRGPRSSDFKNPQVLNSSMLDAMKQDVSAVDLQRYNGENFPESFVKAKFFVIKSYSEDDVHNCIKYGAWSSTPTGNKKLNAAYYEAKENSQECPVYLLFSVNASGQFVGLAEMVGPVDFNKTMEYWQQDKWIGCFPVKWHIIKDIPNSLLRHITLANNENKPVTNSRDTQEVNLEHGTKIIKIFKEYMSKTCILDDYKFYE…
	AT3G13460	AtECT2	MATVAPPADHLLQKLSLDSPAKASEIPEPNKKTAVYQYGGVDVHGQVPSYDRSLTPMLPSDAADPSVCYVPNPYNPYQYYNVYGSGQEWTDYPAYTNPEGVDMNSGIYGENGTVVYPQGYGYAAYPYSPATSPAPQLGGEGQLYGAQQYQYPNYFPNSGPYASSVATPTQPDLSANKPAGVKTLPADSNNVASAAGITKGSNGSAPVKPTNQATLNTSSNLYGMGAPGGGLAAGYQDPRYAYEGYYAPVPWHDGSKYSDVQRPVSGSGVASSYSKSSTVPSSRNQNYRSNSHYTSVHQPSSVTGYGTAQGYYNRMYQNKLYGQYGSTGRSALGYGSSGYDSRTNGRGWAATDNKYRSWGRGNSYYYGNENNVDGLNELNRGPRAKGTKNQKGNLDDSLE…
	AT5G61020	AtECT3	MANPDHVSDVLHNLSIDPTTKALAPDSETKLQGAYGGNGNDFLLNDELVEATKIGKPSLLSKDGGVTKDKGSNLKKLGYQSAAYNAKGSYGKGAYAYGYYPPAYQYPRHGYTGSYASGKTNLQYQYLTQQGRSAGNGQSYGGYMDNIYSNYGMCGPYTNGYGYGSYGYDSWKYMPNWYAVNNTYKPRNGYHGYGKENIEGLNEMNRGPRAKGFNSQDGSKVMAVSLKEQRVTETEKLSEDVSLLDPKDYNKIDFPETYTEAKFYVIKSYSEDDIHKSIKYSVWSSTPNGNKKLDASYNEAKQKSDGCPVFLLFSVNTSGQFVGLAEMVGPVDFNKTVEYWQQDKWIGCFPVKWHFVKDIPNSSLRHITLENNENKPVTNSRDTQEVKLEQGIKVIKIFK…
	AT1G55500	AtECT4	MSTVAPPADQAADVLKKLSLDSKSRTLEIPEPTKKTGVYQYGAMDSNGQVPSFDRSLSPMLPSDALDPSVFYVPNVYQQPYYYGYGSDYTGYTNSESVDMTSGAYGENASLVYPQGYGYAAFPYSPATSPAPQLGGDGQLYGAQQYQYPFPLTASSGPFASSVPASTQSKLSTNKAANSASAGIPKGMNGSAPVKPLNQSALYGNSALGGGLAAGYQDPRYSYDGFYTPVSWHDGSNFSDVQRSVSGSGVASSYSKANNNVPATRNQNSSSNSHYTSMYQPASMTGYAAQGYYDRVSPNKSYGQYGSTVRSGMGYGSSGYGSRTNERGWLNTDNKYRSRGRGNSYFYGNENIDGLNELNRGPRAKGTKATEEVSSEEVKKQTFDESNTEETVTCVLPDR…
	AT3G13060	AtECT5	MKEQTVPANNETSASFKSSQEAPVVVHPAKVAPLTGPYGLAGDFAGHLPSSILSPQAQGFYYRGYENPTGEWDEYSSYVNVEGLDITSPVGFNENASLVYQTGYGYNPQMPYGPYSPAASPLPSEGQLYSPQQFPFSGASPYYQQVVPPSMQYITSPTQPELTSLVGVDQQGDNIGPRQSYHPHPIGPFNGNQPNLGFPEWQQGFDGGIWSDWSKPSDMHRHSSSISPALSPQPLGSYGSYGQNIPMGSQRQRSFYGFGSGSNSYNRGYMHSGGRGQGSNYGSRLISNVGMGNQGWIGVDNSRGRGRVSDPSLGGAYNGTFDILNEQNRGPRASKPKTQVLEELDSAADSKKNNKGSAKEHEESNNADFVTDYTNAKLFIIKSYSEDNVHKSIKYNVWA…
	AT3G17330	AtECT6	MYTEGASDFVIDQSMYYPAYYSSGYDSSVGLQGGQNENAPYICYTPSYGYAQSPYNPYNPYIPGASIGVDSSFVGFQQYYSDPPYESAASSPTYVPYVIQPDMVSNSSTDSLVANGGQSDGRGSMQRNGSAIAGLPKDAPKSTTTGQYKQPGIPKNVSTTASAHSLQGKTAYANTLLPYGKSDIANGVSSIASYSYKPCSKIYDARGDNNTTGSTYTSEQNRGSRTRRSRNQLIVKAYTTKAGNADAEGNIVINPDRYNKEDFSIEYSDARFFVIKSYSEDDVHKSIKYGVWSSTLNGNKKLQSVYEDAQRIATEKSRECPIFLFFSVNSSGLFCGVAEMTGPVSFDRDMDFWQQDKWSGSFPVKWHIIKDVPNSYFRHIILHNNENKPVTNSRDTQEI…
	AT1G48110	AtECT7	MYTSEAAPDFVVDQGMYYPVDASYGYYCTGYESPGDWENHQMFFGVDGSEVQYTGGQNENSPYICYTPSYGYAQSPYNPFNPYIPGASIGVDSAFVAPQQFYSIPPYQSVATSPTFVPYAIQPEIVSNSSTNSLVETGSANRGRSDGRGSRQRSGTATAGLQRNDPKLPAGNSLGKISEKPRPNSGQSRQSEMDKSDSTSSSGQARQGRVTSVSAQPVDVVSSSRVSSFRQLDIAPPQLNDFSKIATNNNNIRPKLYGGHANIIPDTVREQNRGRRSRALGNQLIVKAYTTKAGNADAEGNIVINPSQYNKEDLRIDYSNAKFFVIKSYSEDDVHKSIKYNVWSSTLHGNKKLQSAYEDAQRIATEKSCECPIFLFFSVNASGLFCGMAEMTGPVSFDK…
	AT1G79270	AtECT8	MVKNLKVDPLAKVTASTTSMVSAKENKNQSEAEPSYYETLETYQGLPCPYGGYYGYYYPGLDGSVGEAKDNGYYGYGTEVQYPVMQGENGSVIYLMPGFQSYDASQTYMPINPVGVSSQALHSPMYAAQGYYQNQFGYADVSSPTYLWDPVGDRYVYGVASYTPPLKQNISSSSHNHNNYYSKSKNSFTGHGMGDRPKTPRKASQNSYAPPPLLNQEKGRIAYPMDPVKKKSGALNRDETEKAKARTKENGTSMNDLANGQDHITNGECESCSLDAEGNERSNGVGSVIRRDQYNLPSFQTKYEEAIFFVIKSYSEDDIHKSIKYNVWSSTLNGNKKLDSAYQESQKKAADKSGKCPVFLFFSVNASGQFCGVAEMIGRVDYEKSMEFWQQDKWTGYFP…
	AT1G27960	AtECT9	MAASYRSTDWFPPTTTTGSFTGLNTDQSVLQDQDIVSSRPFCGQGTESFHIGADTPRSNHSHSDVPSFDKVSPGMINEMFYHSNGVPSDFQRSSLSTRNQSSLQHYGDLYADDSRYFVPFHLSNQQYPTPEDIHLSPEFHMFQANSRHFDRHVNERNSSEIDNMMRARGNSVLRDNIYGEPRGMNLNPFSGENMFPPLASTRPCMRHLGSAELLANDFNMGPAHGGLHDAFESAANLSYREQAYAQCKRSPFSASSSSPTWENDYNLPPLDEARSESYNDFSHCPAMLDMLTESNRGPRASRLNSKSKMISYDRVDRFCQQELLSQFRDAKFFVIKSYSEDNVHKSIKHCVWASTKNGNKKLDAAYREAKKKDVACPVFLLFSVNRLFFFITNQNLLEA…
	AT5G58190	AtECT10	MDPASSSSSNQRNRIVSSGERPVMADNGVQQVSHDDGRNIVSSSYSSSVVPSPDPAPYYNVLQTPTNLYHYDWDIANSGYAQGINTWDGYPRYATTTPEAMHVPPVVYNDNSSLMYQYPGYGFNPYPSVMLEGQIPVSPAYYPQPFGAPSAMHYLPSDIDPTSAAYMIPYGQYGGGNYSGNQGDISLTSHIPYPQTMGILGPYDHNASQVALHGSGVASSSSLGGYYHVGSYQNPSSTPSYYGVDNRVRLTPDIGKRREKDQGSISSTSDLYGNRGPRASSRVKSKNSSKPCSTIGDSASDSSTAGPNPSLYNHPEFVTDYKNAKFFIVKSFSEDNVHRSIKYNVWASTPHGNKKLDTAYRDAEKMGGKCPIFLFFSVNASGQFCGVSEMVGPVDFEKD…
	AT1G09810	AtECT11	MATEKNTLDSEATFAQTVPALDSTTKKQDESPPKSTPSLTVTACANGSDVVSSQPNDNGQAHTTDFRKGNHRDKNSSDVYADSTLRGDRPKGSNCLSQTSFSAPKPLGNFNGAGRLPPNTQAHAFRPPFKGKEAAGQFLTFSNQKTSCVPYSGYINGNSNNGFWDQRDHNKKPERNGESDYLVELKCGPRANAKTRPPSESSPLKQNNSFALALRREMYNLPDFQTDYEDAKFFVIKSYSEDDVHKSIKYSVWSSTINGNKKLDAAFRDAETKTLEDGKKRPIFLFFSVNASRQFVGLAEMVGYVDFNKDLDFWQVDKWSGFFPVEWHVVKDIPNWELRHIILDNNEDKPVTHTRDTHEIKLKEGLQMLSIFKKYSAVTFLLDDMDFYEEREKSLRAKK…
	AT4G11970	AtECT12	MSSDTAKENASVVDSSLTDWKQDLGNSDDPESTSYRSKEDHKLSKVDVDRRNFPDQLESAKANKNSKPGYRTRYFIIKSLNYDNIQVSVEKGIWATQVMNEPILEGAFHKSGRVILIFSVNMSGFFQGYAEMLSPVGWRRDQIWSQGGGKNNPWGRSFKVKWLRLSELPFQKTLHLKNPLNDYKPVKISRDCQELPEDIGEALCELLDANSCDDGLLNSSSRDDYSTKRSRAEPPSSSGDDEYNNNLWGHTPMSYPPTVYPNQDDLSRFHLAQQRGYGVSPEYLHTSPGASNSRTEQDKSLRFNSWCLPLESPLANSLTDDDFLEMVVAYLLVTYAENFIPLRPLVLELDIFCKSCCLVESRIVMTHYWKLGENICSIFQTLSYFSVLFLIHNTYISQC…
	At1g30460	AtCPSF30	MEDADGLSFDFEGGLDSGPVQNTASVPVAPPENSSSAAVNVAPTYDHSSATVAGAGRGRSFRQTVCRHWLRGLCMKGDACGFLHQFDKARMPICRFFRLYGECREQDCVYKHTNEDIKECNMYKLGFCPNGPDCRYRHAKLPGPPPPVEEVLQKIQQLTTYNYGTNRLYQARNVAPQLQDRPQGQVPMQGQPQESGNLQQQQQQQPQQSQHQVSQTLIPNPADQTNRTSHPLPQGVNRYFVVKSNNRENFELSVQQGVWATQRSNEAKLNEAFDSVENVILIFSVNRTRHFQGCAKMTSRIGGYIGGGNWKHEHGTAQYGRNFSVKWLKLCELSFHKTRNLRNPYNENLPVKISRDCQELEPSVGEQLASLLYLEPDSELMAISIAAEAKREEEKAKGV…
Oryza sativa	EEC73765.1	OsMTA	MEAQADAGGDDLAAMREQCRSLEEAIGFRRETQMGLVASLQRLVPDLVPSLDRSLRIIAAFNDRPFVPTPNPDGGHGKSPAALKPHHRRALPDPARSTRRKTSPGSSPASVAAAPGGLDAVRTMVAVCLLELVPFAEIDAAALARRLQAESSSASEAERTALADLAAELGGSAASAVVLALRRIAEDTGGVQIEEAMIGGKSMTMVWAIDRNKLLKELPESATLPLLQPPPAPQMPPSETDAGSAMIPRTPQQQQPQPDMWPHSMPPIFPRPRGMTMQGMQRVPGVPPGLMPLQRPFMGPAGVITMGGGVGPSPNQQKQKSEEDELKDLELLLNKKTYREKQNTKTGEELLDLIHRPTAKETAVAAKSHTVSPVVVNELAVADLGFEPRGLNVKTIAYE…
	NP_192814.1	OsMTB	MGISESDELRAFEATGIYRLAESGAAFLDPVRILNASYRRFRLVPSAYYSRSFGTSRQGGEAETERTGEASPERKKRKRKRQRQPKPRELNEVERMAEARHQEARPLLSSAHKSLLKAKDLLEFLPRMIKEDVRVLDVESNLEKNLVELGSSWRAPLCEMTLCFQKSSGEDSEEDNYNQGYNLIVVDPPWENGCVRQKVAYPTLPNRHFLYLPVQELAHPAGALLVLWITNREKLWKFVEEELFPAWGVKDHTVFYWLKVKPDGSLIGNLDLLHHRPYECLLVGYINLNKEAVRGSKFKFLEERRNIMVSMAKAISRVTLFLTYTAFAILIGGVHLQNVRVEQQNGEAAASALCLYVWQRLCVTARGVGPKAPNPLIPRRAEAVAPAADRDVQPDATDL…
	EAY88549.1	OsMTC	MDSRSPKIPRRSPDDSKDKDSDRNRGRDEKNDWDSSRTYGSETDCKEERCDTNKRKGSAMGEDVGDDSRSVDRSHETEVHVFNDKQDKAVEIKNILHDGVGQSDYGQHQLGLDNERRNGTVDKSRVDAHIDDKLGSGRDRNWTGKTQEPEGSVDYLRSCKWQDSKEASDSEWKNAQERQDGGGFHGRVGYRRDFRGRSESTRGSSTYGSRYDTSDSIEIRPNNSLDFGREGSVSGRYDVGVGAHRDVTYGTNGDKVTNSEPDQSGSASMISQFPQHGHKGDRPSRGGRGRPNGRDSQRVGVTLPIMPPPFGPLGLPPGPMQHIGPNIPHSPGHPLLPGVFVPPFPGGPLLWPGARGVDVNMLSVPPNLPIPPPVAGEHSFTPGMGAGPNIHLNQFGSGI…
	XP_015617231.1	OsFIP37	MTDSPSPRLDEEDAFGRDFNSSPSPTAPPARSGEKRPFGDLDDDDEDVFASKKGKTKVEESAPGAATGMILSLRESLQNCKDNLASCQVEREAAKSEVQKWHSAFQNIPAVPAGTNPDPVSVVSYLNNLKSSEESLKEQLEKAKKREAAFIVTFAKREQEIAELKSAVRDLKTQLRPPSMQTRRLLLDPAIHEEFTRLKNLVEEKEKKIKELQDNVAAVNFTPSSKHGKMLMAKCRTLQEENEEIGAMASEGKIHELGMKIAVLKTRNNELRNQFNELYKHMDGLTNDVERSNEMVAILQDELETKDVELRRLKEMLAQKEATDEDKIPQENDVAGDDIDAAAESQPIKVET
	EEC75565.1	OsVIR	MGRPEPVVLFAQTILHSQLDEYVDEVLFSEPVVITACEFLEQNASPSTPNISLVGATSPPSFALEVFVHCDGESRFRRLCQPFLYSHSSSNVLEVEAIVTNHLVLRGTYRSLTLVIYGNTAEDLGQFNIELDLDHSLANVVSSPSEGKLEDLPPALHSSKFTFEESLSSLKPLSLQATELDLSIEVKKILLLALTMYQIPNVENLIPNLQSAVISAVLKYMPASTNCMSRNWNRDPANCFAEDNVDSQGTSNTLLMEASNELFDIWKNVNSIVDNITFDDNGLAFRLEELPTTKHLFTLFDSCFPYYRNCSLLDLECPFQPLVDLQSAVVNIVSNLPSEELSSDGVNFLSSASIELAELLKMINMCVPIEDPSPVLTARRICKFGHLEGLLSYNLTIGL…
	EAY79051.1	OsHAKAI	MLQIRLSKIGSSDSGAAASGAAAGAGGGVGGGGVGGAGAGAGGGPPKSASAAAGGAPESVTVACPEHLVISDLAVAKSLGAVTTSAVAAARTIGRRSRRPLGERVHICCRCEFPIALYGRLIPCEHAFCLACARSDSSCYLCDERIQKIQTVKMMEGIFICAAPMCLKSFLKRSEFDSHIPEVHANLLHNTPEREERNEPDAPNISRASGGDQRQSQMPEMSTARAPPRTGVSPSSSSHVQDRDDRSRYHHSRDQTPQRPPMLSRPPSFHGRHSYPPGDTPSENNPPQGFDRPYNWAHENAPGVTPVRQESEHGSQDKQQMMPNAPFMFPPMPHQPNFMMPMNMNQPLMSNTSFNYPLQQDGNPQFFSAPFQMQLPDVGLDQGSASGVQPTPPGPLSFP…
	EEC76411.1	OsALKBH1B	MVGGGGGHGVRTPANFPPRQKARLPRGPAHEKSLEQQKKGPSSSSPSVSSNKSPLQLAAAIVQPQKPLESPQHMVTPVRLQEAPGPRTIPCSSGSVGSGSGAAPFDICIKRDDKCSIKLSRSLLEINREKRREREQLSKEAAPLQYLRPGMVLLKKFLKHDDQVDIIRRCQKLGIGSGGFYTPGYRDSGKLSLQMMCLGKNWDPNSRSYGDTRPFDGAQPPSIPEVFSKIVKDAIQASNEFLRQKARPANDVEELPPLSPDICLVNFYTSSGKLALHRDKDETKPSLHKGLPVVSFSLGDTAEFLYGDVNDVDKASKVDLESGDVLIFGGKSRLIFHGVSRIKPKTAPNWLTDEAKLRPGRLNLTFRQH
	EEC68179.1	OsALKBH2B	MQMSSGGVGVGGGGGSKVMSPKQVLTVVLVVFCALSFVKLLLLTGSSSPAAAARRGRASAWGNGTDVGDGGLAPKEAALLRSVVAARAPCRLLVFGLSPQLAALAAVNAGEGADNGAEDADSARRSLRGGSAASAASAAKIHQVRYRDAAGEAWPLLRRARDSPACRRPTGAVRRSGCHLALITTLPREVLDARWDVLVVDGPSGAAAGEPGRMGAIYTAAALARASAAGGREAVDVAVHDVHRTVERWYAWEYLCEDNLAAAKGRLWHFRVAGGGPPDAFCSTGPAQIFTQIPLPSASPETGAVLEDGDGDRAVGLFIASGAKRLILINEKRQTRQLDLVSAPNFLEDKNLESLSAQIIINLLATENLESLENCHIGDSWLEDQKGGRKFPGQNPDHA…
	XP_025880967.1	OsALKBH3B	MAGSGYTRPPPPPPLGEGAAPAPSAALYVANCGPAVGLTHDDIRAAFAAFGEVAGVHGADGSGVRVIVRFREPAAAEAAMSALHGRPCAGLAGRVLHIRYSVPAKPKAPVGGSLPVATSASELGVPGIYLVPDFVTAAEEQELLAAVDNRPWKSLAKRRVQHYGFEFLYETRNVDSKQFLGELPPFVSKIIDKIMSFPGANKCTSKLVDQLTVNEYPCGVGLSPHIDTHSAFEEMIFSLSLAGPCIMEFRKYPKGSWRAPSMVSGTDKDSIEEPQCIRKAVFLPPRSMLLMSGEGRYAWHHYIPHHKIDDVGGQVIKRNTRRVSFTFRKVRMGLCDCEYGQFCDSQSK
	EEC74839.1	OsALKBH4B	MASAAVIPSSAPGAAAAGAAAVESAGWVVDERDGFISWLRGEFAAANAIIDLLLLHLRSVGEPGEFEHVAAAVQQRRHHWAPVIHMQQFFPVGDVAYALQQAGWRRRAPPHHQQQGPGASPSPPPPPPRGRPSFSASHSHHRHGGHHHRSDSVRGGGTGATAGSDKDGREVHNKEEKGMKEAENVVEAKSSQLESLVSHEGEKTPRPQAVAEGSSKVVPTPVEYTVNDIIDGKTVNAVEGLKVYEGLVNENEKNKILSLLNETKASFRRGGLEAGQTVIIGKRPMKGHGREIIQLGIPIVEGPPEDDYPRETKVEAVPGLLHDLFDRLCQKEIIPTKPDYCVIDYYNEGDYSHPHQSPPWYGRPFCTFCLTDCDMVFGRVISGERGDHRGPLKLSLSTG…
	EEC79195.1	OsALKBH5B	MTTGAAAGAAAAAGAAPASPVAAAAAAAPEVAARDAVIGWFRGEFAAANAVIDALCGHLAQIGGDAEYEAVFAALHRRRLNWFPVLHMQKFYSVADVAAELRRVADARASATYSEEEAASTVIHEPMDELVAMAAEPEPEPEQEQEPDHDHVPQDPAPEPEPDGAVNNPVSPTAAEVLDHEADGEDSSGDSSERKAPSTEDDAVADGRHVRSARWSQPVRRDGTARLIAIKRSQTLGRVKWTRTRLAGRRVTVEKSIRSCPTLHVSMTGWTQIGFEKPEFPGSEGLDLMIILTKDLKGNTAYQRVTLSALITRSALSAPRGSRFRKVNVVKGLKIYEDVFTTSELMKVADFINEIRQAGRNGELSGETFIFFNKQIKGNKREIIQLGVPLFQPTTEESN…
	EEC79953.1	OsALKBH6B	MALVQGYNADELAIAGEFLTTWLPFLSAGLCASCADSLRSRVSSLLPPQAEESPSSPPPRIDQIEPSGWESDPATAHPQHLPFEPSGWDSDPPQLPPEQEQQKQKPQPAEKPRKSWADMAQEDELAAAAEEDAAAAAADDGEEGSEAGRPGVQLTREQRELRRFRNVVRRKDFICFERVNGRLVNILAGLELHCGVFSAAEQKRIVDYVYDLQEMGKHGELGDRTYTEPQRWMRGKGRVTIQFGCCYNYATDKNGNPPGIIRTIASDPMPSLFKIMIKRLVRWHVLPKTCIPDSCIVNIYDPGDCIPPHIDSHDFVRPFCTVSFLSECNILFGSTLKIAGPGEFTGSLPIPLPVGSVLILNGNGADVAKHCVPAVPTKRISITFRKMDPAKRPFNFRDD…
	XP_015617231.1	OsALKBH7B	MAAAADDDELRRRAAALREVFGDSSDSEADDLPVGGAGREQWRWEAVEGVRGLWLCAAFLSADEQSRLLTAIRREGWFSDARNQAMRFGDLPSWAVELSALIHEAICFGDVRVGCGLELKNEDEDACPLPSDLLWRKPLFDQMIANRYEPGEGICAHVDLMRFDDGIAIVSLESPCVMHFSRAEQEVPICETLESVHAEPTKIPVYLNPGSLVLMSGDARYLWKHEINRKPGAQQWGGRELEQQIRTSITLRKLLPSPN
	EEE65538.1	OsALKBH8B	MMASRSRLRLAAAGENPIPHSKSGGEGGTERKPEEALRREVTDLGGGSEVVHVPRFVPREAAWGWFDYLDKRIPWTRPTIRVFGRSAVQPRDTCYVADEGLTDLRYSGHQPHAHSWDEFPVLKDILKAVHEALPGSHFNSLLLNRYKTGSDYVSWHADDEPLYGPTPEIASVTLGCEREFLLRKKPTKSQASLGSGEVAPKRLKVSAPQQHSFLLKHGSLLVMRGYTQRDWQHSVPKRAKASSPRINLTFRRVL
	EEE50972.1	OsALKBH9B	MEDDKTTQESSAAAAPPLRSLADYAVGPIPTLLYVPGFISDAEQSQLLHHIYQAPAPKWKSLKNRRLQNWGGVVHEKGLLPQALPSWLTKITDRICQWTGLFPSAINHVLINEYHPNQGIMPHQDGPAYFPVVAIISLASPVVIDFTPHQRLKGEDFTDPQNAHSGESQATTTESNGSHNLEGANETDPASSSLLLMPCSLLIFKDQAYTDYLHGIQDNELQNLDKVANMLQCPEFKHLNSGDGQGNTDESCSLEQSGVYRRTARRVSLTCRLVLKVHKKLFKM
	EAY77528.1	OsALKBH10B	MAAPGPGWMVPPPPQPQPQQQQQAVVVDGRDGLVAWLRGEFAAANAIIDLLLAHARDAADPAGFDAVAAAVQRRRHHWAPVLHLQHYFPVTEVALALHHAAARQGPPPPPPPPRPPSGSAGAEGDDAAIASGGVKEVETSAEATQNSQLVSHISHATEAQPQKGLHVISNVVPVPTCFVVNEVIDGRMVNVLEGLKLYKGYVDLTEIGKVLSFVNEAKTMRRKPGLEGQTVVVAKRPMKGHGREIIQLGLPITEGPPEDEHLREVKVDPIPGVLQNLFDSLVHQKVVPSSPDYCVIDIFNEGDYSHPHHHPPWYGRPICTLCLTDCDMVFGHVIAADSRGDHAGPLKLSLSTGSVLVFEGKSADIAKRALPATSKQRILLSFGKSVSRKHVQSESSLLI…
	KMQ82571.1	OsALKBH11B	MAQPGAGQSAAAGYNGYCVFIQVLAMTIDLFEDALPPPWREEIAPGAVVMHGFVRDHGPALLAAVQGVVAQVPWQHLTTPGGHVMSVAMSWCGNGWTSDSRGYRYSERDARSGERWPPIPPILMALADEAAQQAGFGPFVPDSCLMNRYDPGSKLSLHQDKDEHDFGAPIVSVSLGLPAVFQFGGLQRSDRARRIPLAHGDVVVWGGPSRLCFHGILPVKEGYHSLVGPHRINITLRKAL
	EEC79196.1	OsALKBH12B	MIILTKDLKGNTAYQRVTLSALITRSALSAPRGSRFRKVNVVKGLKIYEDVFTTSELMKVADFINEIRQAGRNGELSGETFIFFNKQIKGNKREIIQLGVPLFQPTTEESNCHIEAIPLVLQAVIDHLVLWRLIPESRKPNSVIINFFDEFCQVGHLSMSKDLSVLVPQVTYTNQFTDEKLKFAIQLELPVAVVRQNTQSAQNEVFECYISVEAGASKVSHIKTCDTIKLIHMTSR
	EAZ07969.1	OsECT1	MSSIAVINPPRFDGERKPKTANIMVNASAQFCGVAEMIGPVDFEKSVDYWQQDKWTGQFPVKWHIVKDVPNNLFRHIILENNDNKPVTNSRDTQEVKLEQGMEMLKIFKDHEEDASILDDFDFYEERERALLENKARLHQQHQLPSSTVVEPKKPLTVATDLVGHITKSFAQAVRLGEAKNVSPNSADKGASGDSSVAAKPLEVKEAGLA
	EAZ02076.1	OsECT2	MKGEACGFLHQFDKARMPVCRFFRDFGECREPDCAYKHSYDDVKECNMYKMGFCPNGPNCRYKHVKLPGPPPPVEEVLQKILQIRSFNKFNQHRHNNYNQQGERPQHPQGSGLPNQNSIDNTTTTTAQPAVGQQAQTTNQQPPQQQQQQQQQQQQQQQKPNTNDQVQSVPNGSSNQATRIATPLPQGPSRYFIVKSCNRENLEISVQQGIWATQRSNEAKLNEAFESIENVILIFSINRTRNFQGCAKMTSRIGGYIGGGNWKSAHGTAHYGRNFSIQWLKLCELSFQKTHHLRNPYNDNLPVKISRDCQELEPFIGEQLASLLYLEPDSELTAILIAAEAKKEEEKAKGVSADEAADNQDIVLFDDNEEEEEEESEEEEEGNGQESQGRGRGRGMMWP…
	EAY95481.1	OsECT3	MSGGATPRRARSERRRQALGQIHAWQGSGGAVELRWRLRRAPPLVNGSGQFCGVAEMIGPVDFDKSVDYWQQDKWSGQFPVKWHIIKDVPNSLLRHIILENNENKPVTNSRDTQEVRLDHGLQMLTIFKNHEVETTILEDFDFYEQREKAMLDIRQRQKQQHTDSEVQKPMVEAKEPVDLMNQISATFARAVQLGETKGSREDKPKVEDASAAAVAVPENEPVALAETEGLLADSEPSPLKESG
	EEC83121.1	OsECT4	MAEGERHRWRRHLERESEGEGKRFQDCMIPPQSEIVGENNASKSAAKEQILSSTNEKMTTSVPQGASSSKSPKGAQEKASFLGKGGEQPFYQPNVYAPQPQTIYSGGYLNHLGQWEEYPHYVNMEGLHSVSPGIYNDNQSIMLSPGYANNPQMMYGAYSPGVGDGQPYLPLHFPFSSPYYQPPASPSMGYSNSATGMSQGDPMLQQEYFLPDGLLYSPTPGYHQPFGSFDRASTQPSSTPGLFGQGNTPLAFGMHHGSMYAPGSYKPRQQGGKFGGTTPSWSSGRRFGTFDLSANQQKGSMPFGIQNGALEFLNEQNRGPRATKPKKQDTENSSIDDKNEKNVPLVDSELYNRPDFVTEYKDAKFFVIKSYTEDHVHRSIKYNVWASTASGNRKLDSAY…
	EEC76691.1	OsECT5	MSALSHTEGDSSGFTRNNDRNDDAVGGEDSTSSYQPCNSMKCKDGTQIMSLANEDVSNLASDCQEPPSESNHAISHGSNTDSKEEMSSGSGYRRQQSCFSSSTCSWRSSSEVESVSSTPDGSGDVVGNMSVRSKTFERRPDHIASYPSASPDIRRLYAAEGKAGFTLDYHSEERWSRRSNQSTAFRTSNGQSIEHHSEIVDIPRQANSMDETTSSSSQWSFDNWGPSLPRGMQYGDEIPSLSSQNYGARIPSLSSRQSYGDEIPSLSRNCNYASRQSYGDEIPSLSSRHCNSFSSRQSYGDEIPSLSRHCNTRSSRQNYGDEIPLLSNSDYQCYQDRIPLHHRQWCHDAEAHPQLNYGRGASHGNRYSRDSFVSSIATNQRFKMGTGKHTVTRSDHHRT…
	EEC78360.1	OsECT6	MQEEFDWPTSVLSTSPETENVTSSSVRSTTKNDVVVQQGSISSYWPWDVMKLENDTHFLSHSSGDGMKCTKADHFLSHANRGSLNLDYQEQPSKSNFATDLGSHAYSKEARTLGRVYHGQQPYFSPSSCSWEKSSALKVVPNSPDASGHIVGEMRTKTNILSARSNYLSYPTDVPHIRYRDEVKVDLSQDDNSKQYRRPDQFTAFSNFNGQSSEHLETAKGANYMDEITPISRQWCFDNRGPSLPRGLVYGDEIPSLSSKKCNGNVASSYSRIWDYSAETSSVRQCYGDKIPSLSHHWHYRDKIPLHSGQWCHDAEARPLSNYQQGASYGNGRLRDNISRGGRNEQVNIISSRRTMTKPRVANKVVSSTDHYKINKDNLWRNSEDIRDQVRGPRANKLN…
	EEC81587.1	OsECT7	MEEDDGTVTAEGGCRRAVHTGEEDDDISAVEAKLMEAPANSVAVADGNPKTATETPRVEDYKDAAMYYGTYPAYLYGAYGGWGEYSTYLSHDGAETPTAGAYGDMYYGYSPYGYSTSGHDSQMYGSQHYQYQPTYNKQQNTTGKPSNNGKTENPAALPQGDVSANGVDSLKGQKKTNLLPKASQNTPGSNGSYGRPSGRFGNYQNQTNRTTYPCYSSQIFNGKQQKLPTGNRSLTTSNSKSKGQSRNQNTYPHLMGLQTPTSPLGPPSIYSASGMYGYNGSSYGSGLWYGSHLYGSGLYGGWNALSDGKYNPRGRGNGSYGYIHGNQDGFNELRRGPRSGLFNNQQGVGATVAPVKGQELSASDSSLSVMKDQYNRADFVETYSDAKFFIIKSYSEDDV…
	EEC75127.1	OsECT8	MGSASHPARIEYNTSSNVSSQYIYEQGLYYPATNGYAYYAGFEPPVEWSDHTNFVGVDGQNLQLSNENLPYVYCTPGYGFSYYSPDQYTYMPGMVMGVDGSFVGSQQYFASPYQLPGSLSGFFPMSIQPTTDFSSTVSAEPPLLSTGTGTSAVASRLANTSMKNKYQMSGNTAPASQTAPSGSPAVGRPQQAYENESTNKPSNPPDANMSRRDKSSTSLVTVPVDASSIDKDGKSDEGNQSKEHVQSIQVTSGPMSGESGQGKATSNSTLEKIMIHPDQYNKVHFPVDHPDAKFFVIKSYSEDDVHKSIKYNVWSSTPNGNKRLDAAYSDVQGRAVGKCPIFLFFSVNASGQFCGVAEMVGPVDFHKDMDFWQQDKWSGSFPVKWHLVKDVPNSTFRHI…
	EEC70552.1	OsECT9	MGMTPEQIYGQNVYVPATANPYPYGYTEVGSPTEWYNNQSSLGYDGQDIYFPGFQTEGTQCMYYAAPDNGSVHPSYSPYPINSSFIVDGSYLPLEYVGDAADQTCQIVPSPYYVPTILPYAHDNVLGNTTAPLHPPVYVPTLPSYTVTSTNHALPSVPPVATKNDVIANPPIQSTIVTSKQFLDHASDPKVQLRNPIPLKKELADGSMMPVKYPHTSQAFSNFPERRSAAKHSPQEKFSVNNGSGFVGSNVQRWAAAEKFEPNSNLSGCIGSASPKMKLSNVDGLGGADKPCGQKSSAIIAKSYTSRLSVGDPEGTIVIRCNQYNSNDLRVDYPFAKFFVIKSIGEDDVHKSIKYGVWSSSSSGNSKLDIAFKDANRIAKRNSTKCPVFLFFSVNGSGL…
	EEC74554.1	OsECT10	MAAVAPPQVPAAAPAPAAAAAPPAPAPAAAATAAPVADQTTDLLQKLSLDSQPKAVDAATEPAGAKKGPAASQPLSVAIPPERSITPVLQDFMDPNMFYLPAYYYGGYDGSVSEWDDYPRYVNPDGVEITPAVYGDIYGYGYAPYGAYSPASSPVPTVDGQMFGQHYQYPTSYYQPPTPVPSTTQGDLQPSANPDKPTAKADPAKTTTNGAPNGTVHSNSGTVPLGSSQQNSSLTPDGTYRAPLLGGVPSAGYLDSTYGYDSTGAHFAWYDGSAYTNGQQRTTTTNHMSSSTFSNGSSARTQNKGSTPQQMGMNNRRPTTTTGSAAPTYPNRMYPSTRSYSQYGNSYKTGLSYITNGYGSNGYGSNGYDSRLYGRWGLSMDNRYKPRGRGNGYYGFGNE…
	KAB8082932.1	OsECT11	MENLKINGSTKTSNVNLPATKGASSSDAISCISSGDAASTVKESEMNQEASVGDQGMYYYGYYYPASFGGYDENGYFVGYNGLDVHPTVVQGDNGSYLCYLPGYENGYTYSPIVPGVIAGVDGQYISKEPYYSTISMQDPSTPGIFAQPVAYGPELVPAYTWDHSFALLDGVQGRPVGVHQTNYPARPKYSSNKLPSSKASRNTKSASDTIKGSSSALDTMSTSANGYPSSKTANKASGASISKGYPLSSKFAVHTNQGKGNLYQSKDIGMKESGRSWNSTEKLKARSKLNGYGDCDISDNLTDNSKNSLSPQGGHYGLSSAGGGNDVTPSPVAMSRDAYNLPDFVTKYDQALFFVIKSYSEDDIHKSIKYNVWASTPNGNKRLDNAFKLAQERVAEKG…
	XP_015631697.1	OsECT12	MAAVAPGAGDQATDMMQKLSLESKKEGATPDATKKPAGMPYGSASAGDAQNAASPVDRSITPLLQEAVNANILYQTNGYGPSAYYYPTGYDGSANEWDSRYAAHDGTEMPPSVYGDMYGYGYAPYGPYPSGSPVPTVGHDGQSYGAQHYQYPGQYYQQPAPTNASHGVNAVNSQSEMPSVAAHQARVPVESAKASANGTANGMANTNSSSLARKQTHQNVSVLNNGSYGGGTLQGGPSANNYGHSGLHSPVQWYDGPVYSNGHQRSNTNSTSYGSNSYSAKNQSQRPTANLMGMHAQIPSSGMGLTSPSYHTRMYPDNRLYGQYGQYGNALKTGLGFGSNMYNSRNNGRWGIVDSKYKPRGRASFGFGSENQDGFTELNRGPRSGGFKHQKQFGPSVTI…
	EAZ07965.1	OsECT13	MESAHGGSDRPGLAMCDFVGWVRCRFQMEIASRVHGLYRQQPALKFRRASIPEKDADATNASSVSPVSSSSSWRRDSSCTKGEGSMDSQEPRVDAEQKPVLSDNPEEQTIPSKDEKVLEPTISHDSNGINLPSEGQAQAGTSNIGGGHNAAYPQTMYSSQAQPFYYQGPGYDNPSNEWDGYPPYVSVEGLEAGPAVVYNDDPQLMYHGGYGYDPYAHYSPISTPVPAAVSGDGQLYSQQFSFSAPYYQQSVPPGMPYLSSPTPISQGEAMVPIDPTQGAFIAETLSPNSFLFGPRPEWFRSSEGNGSFPSPAASPQPAGGVSGPFGQSNFPMASGMQSPQHRPFYGFGTPSDSYGRVFSHGGYFPQATNYGGPFPSFGLNGRSSIPMEKGRRRGRGNAL…
	EEE66074.1	OsCPSF30-1	MNFVRKADTKDLANSNISVERPKTPPLPLHTKSSCPTTLLEPLSQTLQKQHGHDAEKEDLTGQPKSGVDNSSIKSAQKSEPSDPSKVVYVRPKSNQLVAAQRQHPIDLVNSPTDKILSLQAPIASDLYLKKRKNQIVLSSCSPSDGLSTKETLPAENSNSEEKKDLMIACSISGIPGVKDRPQKALQTTNNVGRFSHVWTLNGQQPQRKGFMGSSHMNAFPRILPWKRKIFCKNFRSSHMSNVSSIRIVRKLLQTRKRDMIYTVSTDGFSLRKSGVLSVGGSSLKWSRSLEKRSQKVNKEATLALAEVERRKREKRKRQSLHDKGDHQFESVTGNQLRNSCQSSSDLRKPSTCNEYVRVSKGNQLVRNPKNVIRMLASDKVRWSLHTVRSRLAKKQQYC…

## Sheet: TableS4
Table S4 The homology template and docking score (RMSD) in protein homology modeling.
Gene ID	Homology template	RMSD(Å)
PagALKBH1Ba	3tht.2	0.105
PagALKBH1Bb	3tht.2	0.2
PagALKBH7Ba	5yl6.1	0.15
PagALKBH7Bb	5yl6.1	0.139
PagALKBH3Ba	2iuw.1	0.167
PagALKBH3Bb	2iuw.1	0.121
PagALKBH4Ba	4NJ4	0.14
PagALKBH2Bb	4NJ4	0.122
PagALKBH2Ba	4NJ4	0.172
PagALKBH4Bb	4NJ4	0.164
PagALKBH5Bb	3tht.2	0.202
PagALKBH6Ba	4NPL	0.445
PagALKBH6Bb	4NPL	0.437
PagECT1	6zot	0.072
PagECT2	6zot	0.137
PagECT3	6zot	0.129
PagECT4	6zot	0.074
PagECT5	6zot	0.072
PagECT6	6zot	0.079
PagECT7	6zot	0.076
PagECT8	6zot	0.072
PagECT9	6zot	0.076
PagECT10	6zot	0.133
PagECT11	6zot	0.135
PagECT12	6zot	0.074
PagECT13	6zot	0.077
PagECT14	6zot	0.076
PagECT15	6zot	0.074
PagECT16	6zot	0.076
PagECT17	6zot	0.076
PagECT18	6zot	0.141
PagECT19	6zot	0.076
PagECT20	6zot	0.074
PagECT21	6zot	0.075
PagECT22	6zot	0.078
PagECT23	6zot	0.091
PagECT24	6zot	0.077
PagECT25	6zot	0.081
PagECT26	6zot	0.079
PagECT27	6zot	0.078
PagECT28	6zot	0.078
PagCPSF30a	5ZUU	0.066
PagCPSF30b	5ZUU	0.066
PagCPSF30c	5ZUU	0.08
PagCPSF30d	5ZUU	0.066
PagCPSF30e	5ZUU	0.08
PagHAKAI1	2MQ1	0.5
PagHAKAI2	2MQ1	0.5
PagMTA1	5K7M	0.071
PagMTA2	5K7M	0.071
PagMTB1	5K7M	0.056
PagMTB2	5K7M	0.085
PagMTB3	5K7M	0.056
PagMTB4	5K7M	0.085
PagMTC1	7cva	0.225
PagMTC2	7cva	0.13

## Sheet: TableS5
Table S5 The primer used in qPCR
Primer name	Primer sequences
PagALKBH1Ba-F	GCCTCTAGTGCTCATACAAA
PagALKBH1Ba-R	ATAGCGTACTTCCCCAGATA
PagALKBH1Bb-F	TACGGAACAAGGAATGTTGA
PagALKBH1Bb-R	GGGTACTCGTTTACTGTGAG
PagALKBH7Ba-F	TTCTATTCGTGAGGTGGTTC
PagALKBH7Ba-R	TTCTCTCGACAGCAAATCAG
PagALKBH7Bb-F	GTGAGGTGGTTTTATACGGT
PagALKBH7Bb-R	TTCTCTCGACAGCAAATCAG
PagALKBH3Ba-F	ATGGTCCATGAAACTCTTCC
PagALKBH3Ba-R	AGAATTCACGTTCACATCCA
PagALKBH3Bb-F	GGATATGGTCCATGAAGCTC
PagALKBH3Bb-R	CAATTTCAGGAGTAGGTCCA
PagALKBH4Ba-F	TGTGTGCCGGACAGTTGTAT
PagALKBH4Ba-R	CGCACCCACCATCTTTAAGT
PagALKBH2Bb-F	AGTGGATGAAGGGCAAAGGG
PagALKBH2Bb-R	TACAACTGTCGGGCACACAA
PagALKBH2Ba -F	CATTGTGTGCCATCAGTTCC
PagALKBH2Ba -R	CCACCTGACCCTCTTTACCA
PagALKBH4Bb-F	AAAGGTTGTTGCGAAGCCTG
PagALKBH4Bb-R	ACAATCCTCTTCTGCTCCGC
PagALKBH5Ba-F	GGTTAAGAACATGCACAGAC
PagALKBH5Ba-R	CCTCGCTATCTTTTATGCCA
PagALKBH5Bb-F	TCCCCTCAACAATCAATCAC
PagALKBH5Bb-R	TCTTAACCGTGAATGTGGAG
PagALKBH6Ba-F	CGCTATTCTTGCCTGGTTTC
PagALKBH6Ba-R	TGATGCTGCTTCCAGTTTTG
PagALKBH6Bb-F	CAGCGTCATTCGGAAACGTG
PagALKBH6Bb-R	GCTCCTTGGCTGTGAATCCT
PagECT1-F	CACCAACAAGCCAAGTGACC
PagECT1-R	CCCACTCGCCAGTTCCATTA
PagECT2 -F	GCTAGATGCTGCATTCCACA
PagECT2 -R	TCACAGGGAAGAAACCGTTC
PagECT3 -F	CAACTGTGGTTCCAGACCGA
PagECT3 -R	GGTGTGCTAGCCCAGACATT
PagECT4 -F	CCAGTCACCAACAGCAGAGA
PagECT4 -R	TTTCATCACATGGCTTTCCA
PagECT5 -F	GTCTGGGCTAGCACACCAAA
PagECT5 -R	AAATCAACTCGGCCCGTCAT
PagECT6-F	GCAGTTACCTTACCAACTGA
PagECT6-R	AGAGCCAGAACTAACCCTAT
PagECT7-F	CCTAGCTATCCGTATGCTTC
PagECT7-R	CCAGCATTTCCATTTGAGAC
PagECT8-F	GGAATTGCAATGCGTAAAGA
PagECT8-R	GGTACTTGCCCATACATCAT
PagECT9-F	GACTTGAGAAAGGGTTGGAA
PagECT9-R	AGTGACTTCTCTCGGTTTTC
PagECT10-F	TTCATGCTGGCAGAACTCTC
PagECT10-R	CGATGTTGCCTAGCCCATTA
PagECT11-F	AATGCTGCTAACAAATCTGC
PagECT11-R	AGACCCCTGTTTACCAAAAG
PagECT12-F	CATTGGATGTCTCATCTGGT
PagECT12-R	CCATTACATCTGACGGGAAT
PagECT13-F	TCCTTCTCTAGAACTCTCCG
PagECT13-R	GTCAGGGAATCATGATCGAA
PagECT14-F	TGAGTGCTGCTAACAAATCT
PagECT14-R	TACAGACCTAGGATCAAGGG
PagECT15-F	ATGAACAGAATCATGGTCCC
PagECT15-R	TATGCTGTTACTGTTTCCGT
PagECT16-F	GGAGTTGCAGAAATGATTGG
PagECT16-R	ACCGGCTTGTTCTCATTATT
PagECT17-F	TTCTGGACAAGTTACAGTGG
PagECT17-R	TTAGATTCAGTCCGTTTCGG
PagECT18-F	GATCATGGTCCTGTTGATGA
PagECT18-R	TCTATTCCCATTTGGAGTGC
PagECT19-F	ATCGGTTCAGTAGGTTTGTC
PagECT19-R	TATAGCTGGGACTTCGATGA
PagECT20-F	CCTCTCGGGATTATCTTTCC
PagECT20-R	AATTGTGGGCGTTTTATGAC
PagECT21-F	GAGGTTTGTACGAGTGAAGT
PagECT21-R	CAGCATCTTCTTGGTGAAAC
PagECT22-F	TCGTTTCCGACACATACTAC
PagECT22-R	TTCCTTCAAAGCTCTCTCAC
PagECT23-F	CAAATGGTTGTTTGAGGCAT
PagECT23-R	CTTTCCCTTGTGATCCTTGA
PagECT24-F	TGCAACCAAGTGGATTTTGC
PagECT24-R	AACAACAGAAAGATCGGGCA
PagECT25-F	AAGGATCATGATGCACCTAC
PagECT25-R	GTATCATCAGCAAGCAAACC
PagECT26-F	GACGAAGAGTTTTGCTCAAG
PagECT26-R	GGTTGTGATACCATCTTCCA
PagECT27-F	AAGGATTATGACGCACCTAC
PagECT27-R	GGTATCATCAGCAAGCAAAC
PagECT28-F	CGTTGTCCGAGAGTAATAGG
PagECT28-R	CCAGCTTCTTATTCCCGTTA
PagCPSF30a -F	TCAAGGCAGAGGGAGAGGTA
PagCPSF30a -R	CCAGAAAACCTCGGACCATA
PagCPSF30b-F	ATGTGGCCCTCTCACAATCC
PagCPSF30b-R	ACGAGATGCCACACCAAAGA
PagCPSF30c-F	ACCTACTGCTGCTGGTTTCA
PagCPSF30c-R	GCTATGGGCTTCCAGGTACTC
PagCPSF30d-F	GATGATGGGTCCAGGACGTG
PagCPSF30d-R	CTGTTGTTCTGGGAGGACGG
PagCPSF30e -F	TTATGGAGCGAAGGAAGTGG
PagCPSF30e -R	TTTCACCATGCCATCAGTGT
PagFIP37a -F	AGCTCAACTCAAGCCACCAT
PagFIP37a -R	CATCAGCATCTTCCCCATCT
PagFIP37b -F	AGCTGCAGAAGGAAAGATAC
PagFIP37b -R	TGTTCGTACAGTCCTTCAAA
PagHAKAI1-F	GCCATCATCAGAAACTGGCG
PagHAKAI1-R	CCCAATGCCTTTTGCTACGG
PagHAKAI2-F	CTCAACCCTGGAATTCTGGA
PagHAKAI2-R	TAGCTTCCATCCCCTTGTTG
PagMTA1 -F	TGGCGAACCGCAATGGATTA
PagMTA1 -R	GCGCATTTCATCATCAGCCA
PagMTA2-F	CGAGAGACAAGTCGTAAGCCA
PagMTA2-R	ACCAATCGCACTCCTTCCAA
PagMTC1-F	ACTGGGCTATTTTCATGGAC
PagMTC1-R	GCTGTCATCTCTCTAGCAAA
PagMTC2-F	TGCCTTCTATTGGGCTATTT
PagMTC2-R	AGTTCAATACATCGAGCAGG
Pag MTB1-F	CAGGGAGGACAGCTGGAATG
Pag MTB1-R	CGACCATGAGGCCTTTCACT
PagMTB2-F	AGACTCCCGAGAGAGGCATT
PagMTB2-R	TGTCCCCGTCTTTAGGCTCT
PagMTB3 -F	GGTATGCGACCCCAGAACTT
PagMTB3 -R	ATATGGTCGGCAACACCAGG
PagMTB4 -F	AAAGCAGGTCAGAAACCGCT
PagMTB4 -R	CACCCTACCTCTCTTGCACC
PagVIRLIZER1-F	CATCCATGCACGTTGACGAC
PagVIRLIZER1-R	TGCTGAAGGTTCCCCAACAA
PagVIRLIZER2 -F	TGTCGGGTGCTGGTTTAACT
PagVIRLIZER2 -R	ATTTGGACTCTCGCCTTGCT
Pagactin-F	AACTGTAATGGTCCTCCCTCCG
Pagactin-R	CATCATCACAATCACTCTCCGA
